# Supplementary material for: Soluble St2 Induces Cardiac Fibroblast Activation and Collagen Synthesis via Neuropilin-1
Source: PubMed Central journal article supplement (PMC7408622; doi:10.3390/cells9071667), 2020-07-10
Supplement: cells-09-01667-s001.pdf [file cells-09-01667-s001.pdf]

**Table S1: List of primers used for real-time PCR assays in the manuscript**

| Gene           | Primer  | Sequence (5' to 3')      |
|----------------|---------|--------------------------|
| <b>NRP-1</b>   | Forward | CTCCTGTTGTGTCTTCAGG      |
|                | Reverse | CCCGATGAGGATCGGATTC      |
| <b>sST2</b>    | Forward | CGTTACCTTCCTGTGCCATT     |
|                | Reverse | CTCCATTTGCCAATCATGTG     |
| <b>ST2L</b>    | Forward | AGTTGTGCATTTACGGGAGAG    |
|                | Reverse | GGATACTGCTTTCCACCACAG    |
| <b>IL-33</b>   | Forward | TGGCCTCACCATAAGAAAGG     |
|                | Reverse | GCAAACGCTTGGATACTGC      |
| <b>HPRT</b>    | Forward | TTGCTTTCCTTGGTCAGGCA     |
|                | Reverse | ATCCAACACTTCGTGGGGTC     |
| <b>β-actin</b> | Forward | GCCGCCAGCTCACCAT         |
|                | Reverse | TCGATGGGGTACTTCAGGGT     |
| <b>GADPH</b>   | Forward | ACCAGCCCCAGCAAGAGCACAAG  |
|                | Reverse | TTCAAGGGGTCTACATGGCAACTG |

**Table S2. Proteome alterations induced by sST-2 in human cardiac fibroblasts**

| Protein name                                         | Uniprot code | Gene name | Fold-change ST2 /Control |
|------------------------------------------------------|--------------|-----------|--------------------------|
| <b>Down-regulated proteins in ST-2-treated cells</b> |              |           |                          |
| Histone H1.5                                         | P16401       | HIST1H1B  | 0.56029477               |
| Mitofusin-1                                          | Q8IWA4       | MFN1      | 0.6570627                |
| Actinfilament-associatedprotein 1                    | Q8N556       | AFAP1     | 0.66072435               |
| Charged multivesicular body protein 4a               | E9PSI1       | CHMP4A    | 0.69763398               |
| SH3 domain-containing kinase-binding protein 1       | Q5JPT2       | SH3KBP1   | 0.70692753               |
| Small nuclear ribonucleoprotein E                    | P62304       | SNRPE     | 0.71390947               |
| Na(+)/H(+) exchange regulatory cofactor NHE-RF2      | Q15599-2     | SLC9A3R2  | 0.73573919               |
| Tumor susceptibility gene 101 protein                | F5H442       | TSG101    | 0.75621962               |
| Prefoldin subunit 2                                  | Q9UHV9       | PFDN2     | 0.75739442               |
| Synaptobrevin homolog YKT6                           | O15498       | YKT6      | 0.76696515               |
| <b>Up-regulated proteins in ST-2-treated cells</b>   |              |           |                          |
| Nectin-2                                             | Q92692-2     | PVRL2     | 1.31688694               |
| Eukaryotic translation initiation factor 5B          | A0A087WUT6   | EIF5B     | 1.32187402               |

|                               |            |        |            |
|-------------------------------|------------|--------|------------|
| Neuropilin-1                  | E9PEP6     | NRP1   | 1.33730071 |
| E3 SUMO-protein ligase RanBP2 | P49792     | RANBP2 | 1.46901186 |
| ADP-ribosylation factor 5     | P84085     | ARF5   | 1.57810952 |
| Rab-likeprotein 6             | Q3YEC7     | RABL6  | 1.65312128 |
| Interleukin-1 receptor-like 1 | E9PC41     | IL1RL1 | 2.16884842 |
| Ig gamma-1 chain C region     | AOA087X1C7 | IGHG1  | 2.28690335 |

## FIGURE LEGENDS

**Supplemental Figure 1.** Representative western blot out of three. Stain free with 9 controls and 8 ST-2 conditions corresponding to 8 datapoints per condition graphed in the manuscript. Complete blots for  $\alpha$ -SMA and Collagen 3 from main figure 1A, D.

**Supplemental Figure 2.** Representative western blot out of three. Stain free with 8 controls and 7 ST-2 conditions corresponding to 7 datapoints per condition graphed in the manuscript. Complete blots for Vimentin and CTGF from main figure 1A, F.

**Supplemental Figure 3.** Representative western blot out of two. Stain free with 5 controls and 5 ST-2 conditions corresponding to 5 datapoints per condition graphed in the manuscript. Complete blot for NRP-1 from main figure 2A.

**Supplemental Figure 4.** Representative western blot out of five. Stain free with 4 controls, 4 ST-2 and 4 ST-2+BAY conditions corresponding to 4 datapoints per condition graphed in the manuscript. Complete blots for  $\alpha$ -SMA, Vimentin and CTGF from main figure 3B, D.

**Supplemental Figure 5.** Representative western blot out of three. Stain free with 5 controls, 4 ST-2 and 4 ST-2+KO NRP-1 conditions corresponding to 4 datapoints per condition graphed in the manuscript. Complete blots for  $\alpha$ -SMA, Vimentin and CTGF from main figure 3H, K.

**Supplemental Figure 6.** Representative western blot out of five. Stain free with 6 controls, 2 NRP-1  $10^{-10}$ M, 2 NRP-1  $10^{-9}$ M and 2 NRP-1  $10^{-8}$ M conditions

corresponding to 2 datapoints per condition graphed in the manuscript. Complete blots for  $\alpha$ -SMA and Vimentin from main figure 4A.

**Supplemental Figure 7.** Representative western blot out of two. Stain free with 3 controls, 4 NRP-1  $10^{-10}$ M, 4 NRP-1  $10^{-9}$ M and 4 NRP-1  $10^{-8}$ M conditions corresponding to 4 datapoints per condition graphed in the manuscript. Complete blot for CTGF from main figure 4E.

**Supplemental Figure 8.** Representative western blots out of five from each type. Stain free with 2 controls, 2 conditions of  $10^{-8}$ M NRP-1 for 5 minutes, 2 conditions of  $10^{-8}$ M NRP-1 for 10 minutes 2 conditions of  $10^{-8}$ M NRP-1 for 15 minutes, 2 conditions of  $10^{-8}$ M NRP-1 for 30 minutes and 2 conditions of  $10^{-8}$ M NRP-1 for 60 minutes. These blots shown correspond to 2 datapoints per condition graphed in the manuscript. Complete blots for p-NF $\kappa$ B, NF $\kappa$ B, p-p42/44 and p42/44 from main figure 5A, B.

**Supplemental Figure 9.** Representative western blots out of five from each type. Stain free with 2 controls, 2 conditions of  $10^{-8}$ M NRP-1 for 5 minutes, 2 conditions of  $10^{-8}$ M NRP-1 for 10 minutes 2 conditions of  $10^{-8}$ M NRP-1 for 15 minutes, 2 conditions of  $10^{-8}$ M NRP-1 for 30 minutes and 2 conditions of  $10^{-8}$ M NRP-1 for 60 minutes. Complete blots for IRAK1/4, p-p38 and p38 from main figure 5C, D.

**Supplemental Figure 10.** Representative western blot out of two. Stain free with 5 controls, 5 NRP-1 and 5 NRP-1+BAY conditions, corresponding to 5 datapoints per condition graphed in the manuscript. Complete blot for  $\alpha$ -SMA and Vimentin from main figure 5E.

**Supplemental Figure 11.** Representative western blot out of two. Stain free with 7 controls and 6 PO rats conditions corresponding to 6 datapoints per condition graphed in the manuscript. Complete blots for ST-2, IL-33, MyD88, TRAF6 and AP-1 from main figure 6A, F, G.

**Supplemental Figure 12.** Perivascular myocardial fibrosis in control and PO rats.

Immunostaining for  $\alpha$ -SMA, vimentin and fibronectin in control and PO rats

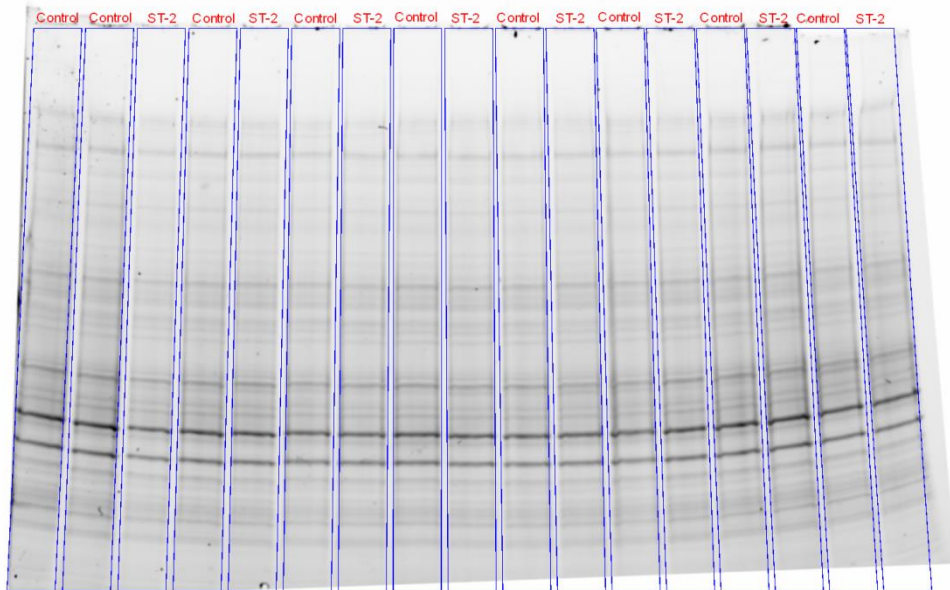

Figure 1A -  $\alpha$ -SMA – 42 kDa

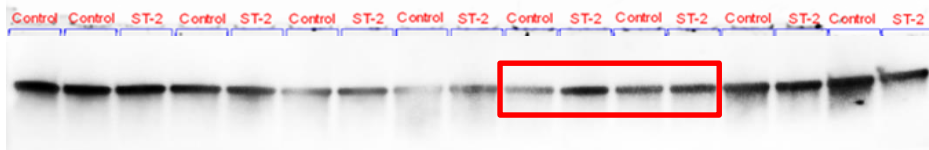

Figure 1D - Col3 – 140 kDa

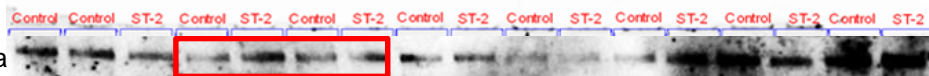

Supplemental Figure 1

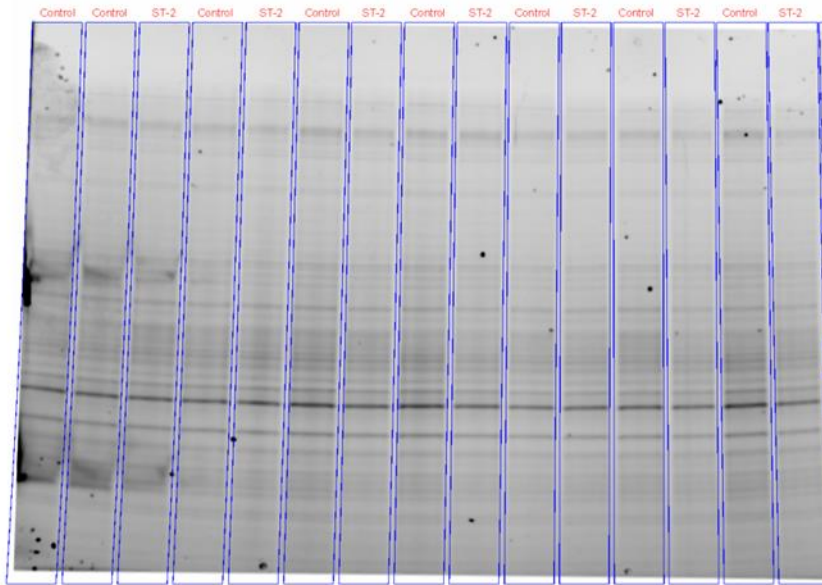

Figure 1A - Vimentin – 54 kDa

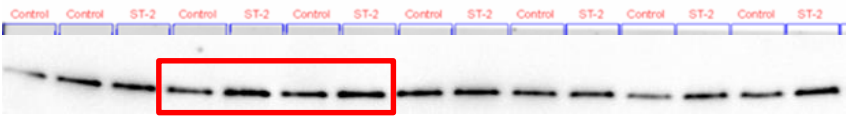

Figure 1F - CTGF– 38kDa

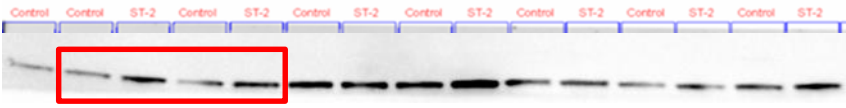

Supplemental Figure 2

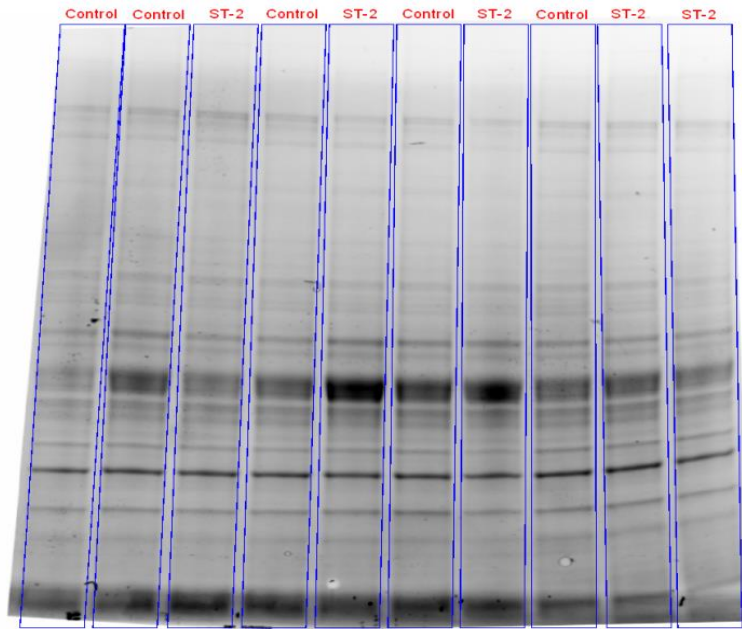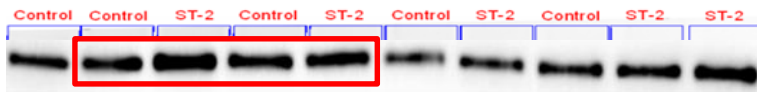

Figure 2A - NRP-1 - 103 kDa

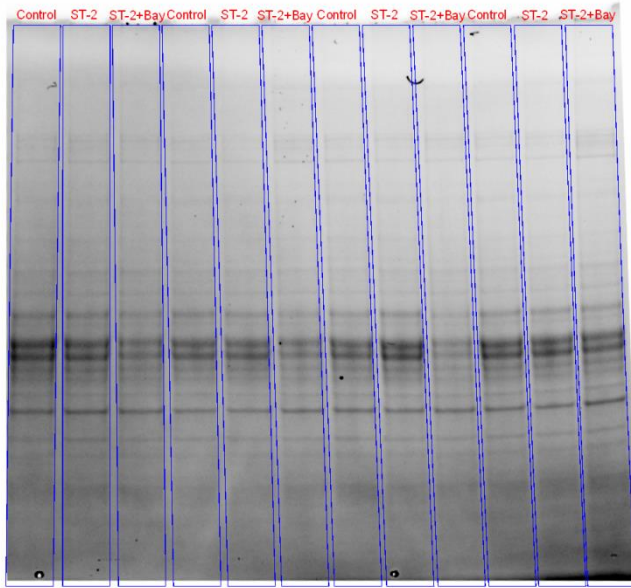

Figure 3B –  $\alpha$ -SMA – 42 kDa

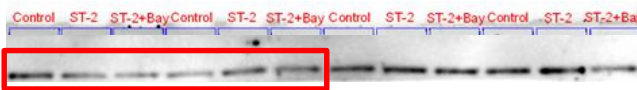

Figure 3B - Vimentin – 54 kDa

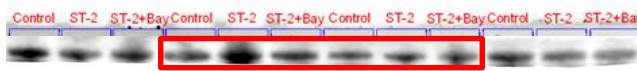

Figure 3D - CTGF – 38kDa

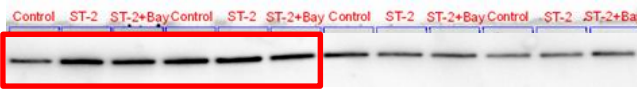



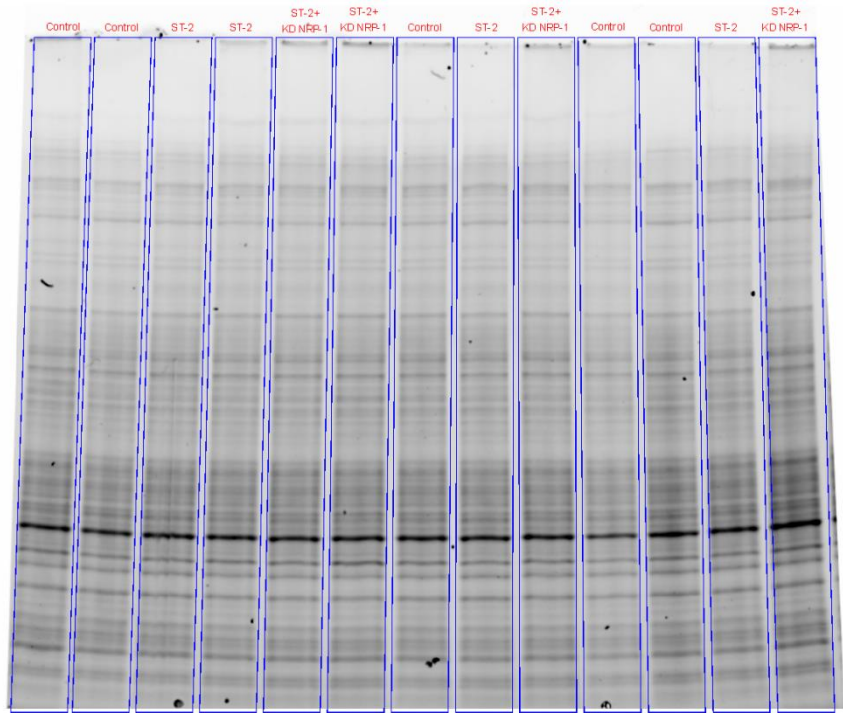

Figure 3H -  $\alpha$ -SMA – 42 kDa

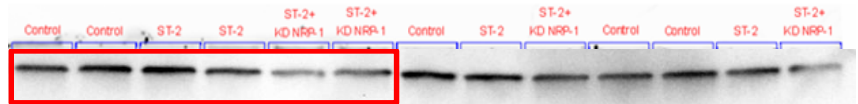

Figure 3H - Vimentin – 54 kDa

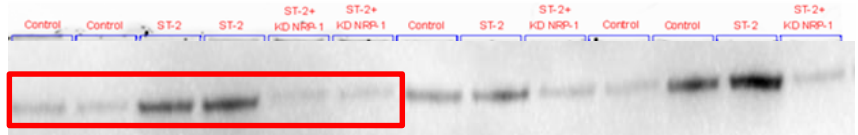

Figure 3K - CTGF – 38kDa

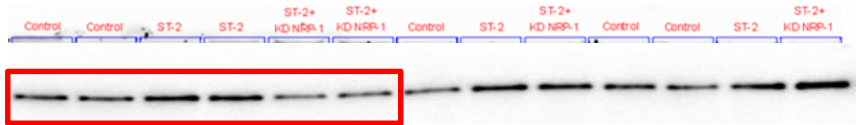

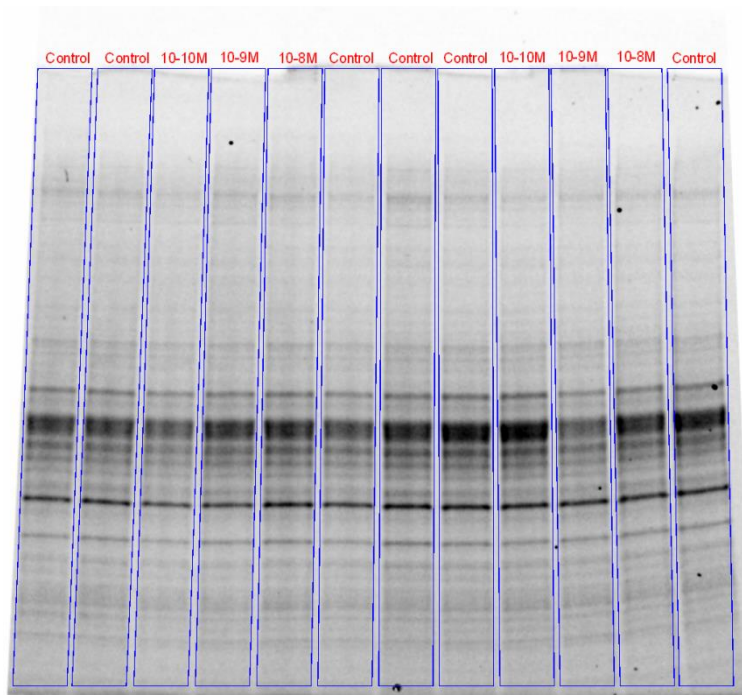

**Figure 4A -  $\alpha$ -SMA – 42 kDa**

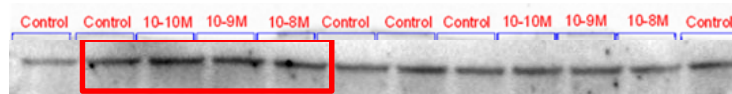

**Figure 4A - Vimentin – 54 kDa**

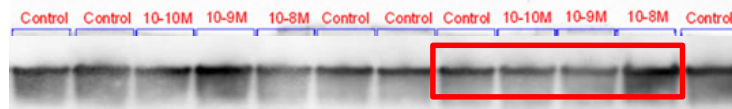

**Supplemental Figure 6**

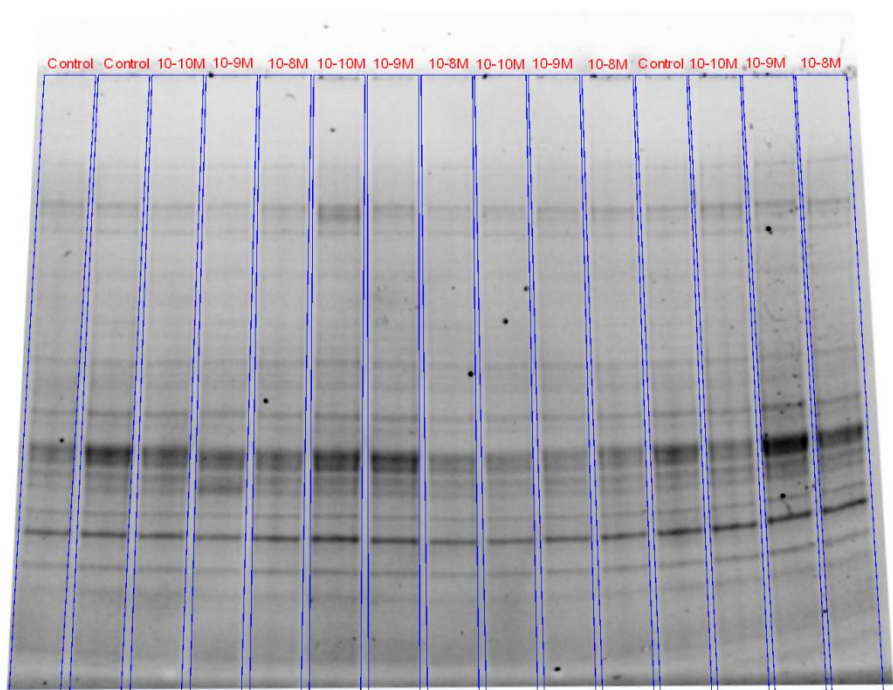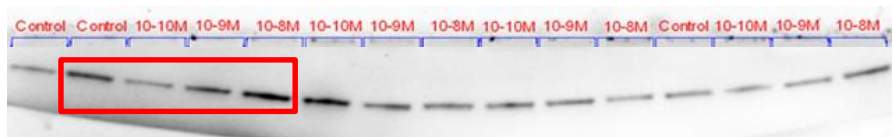

Figure 4E - CTGF- 38kDa

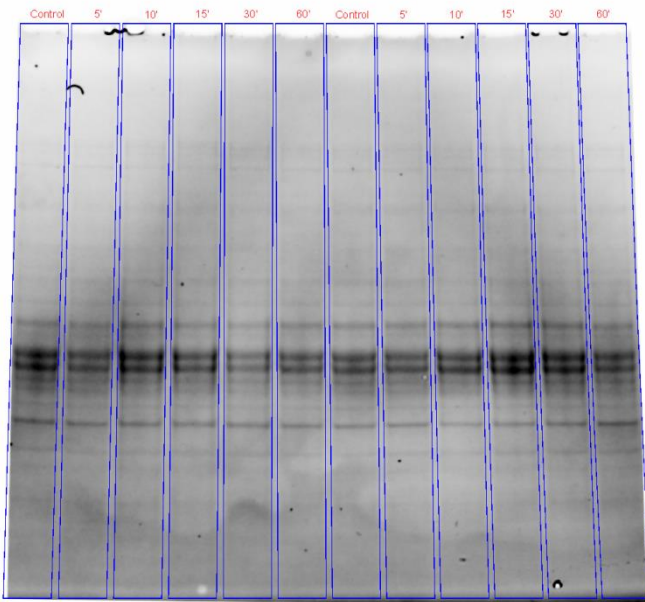

**Figure 5A - p-NFκB – 65 kDa**

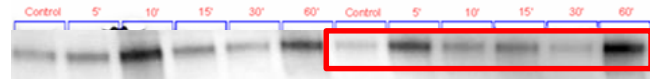

**Figure 5A - NFκB – 65 kDa**

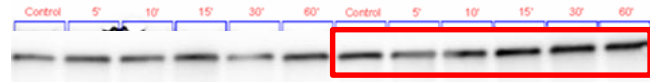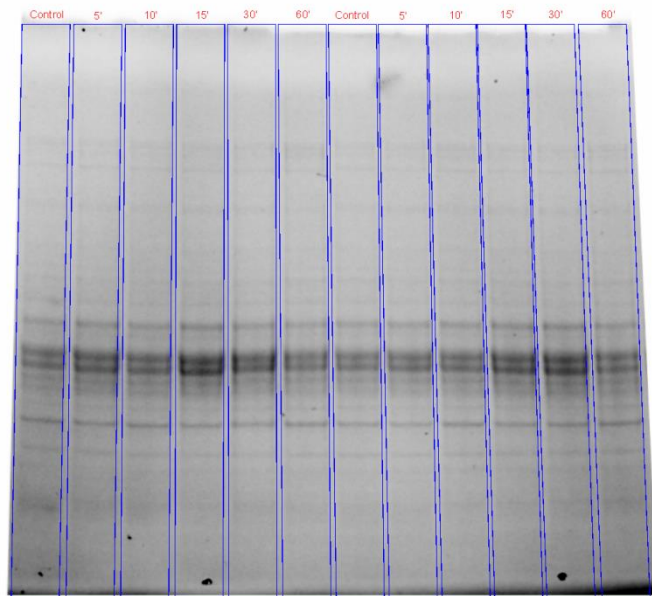

**Figure 5B - p-p42/44 – 42-44 kDa**

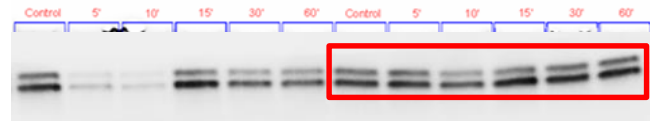

**Figure 5B - p42/44 – 42-44 kDa**

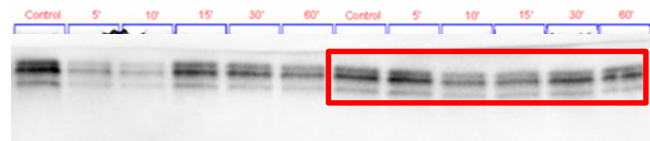

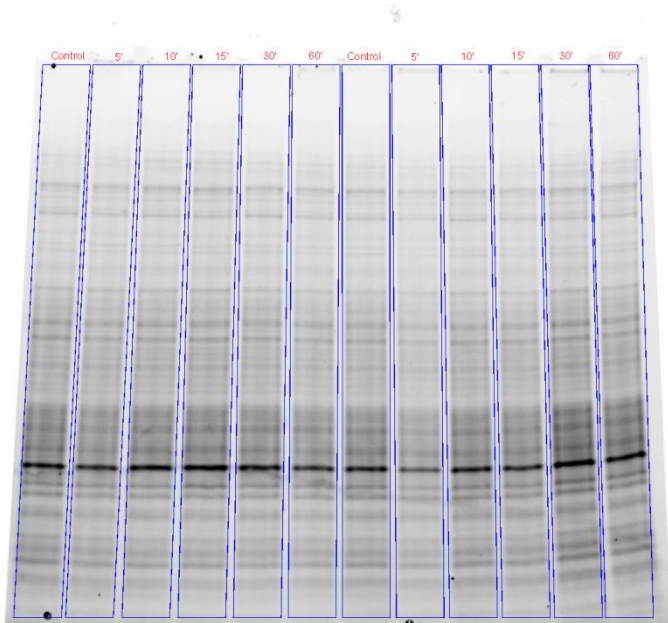

**Figure 5C - IRAK1/4 – 80 kDa**

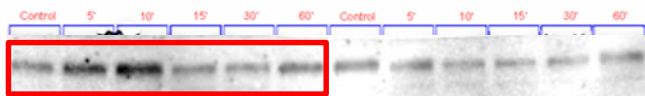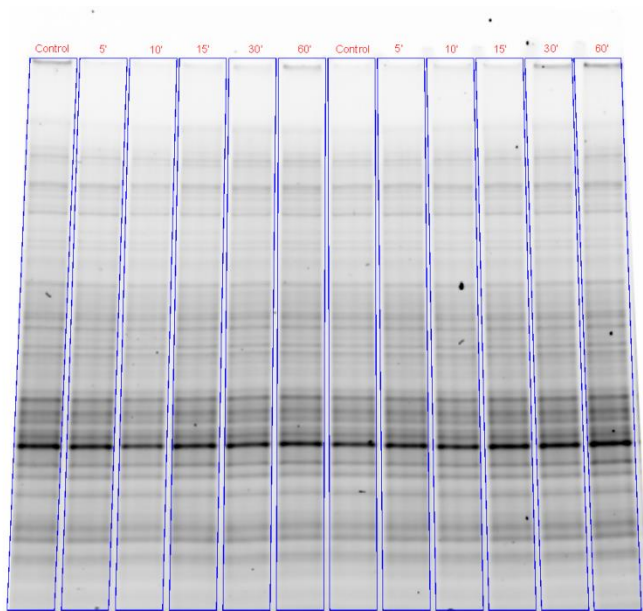

**Figure 5D - p-p38 – 43 kDa**

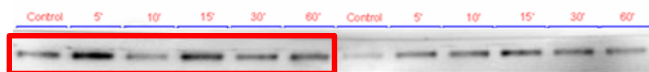

**Figure 5D - p38 – 43 kDa**

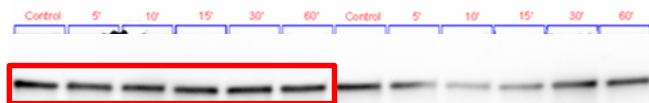



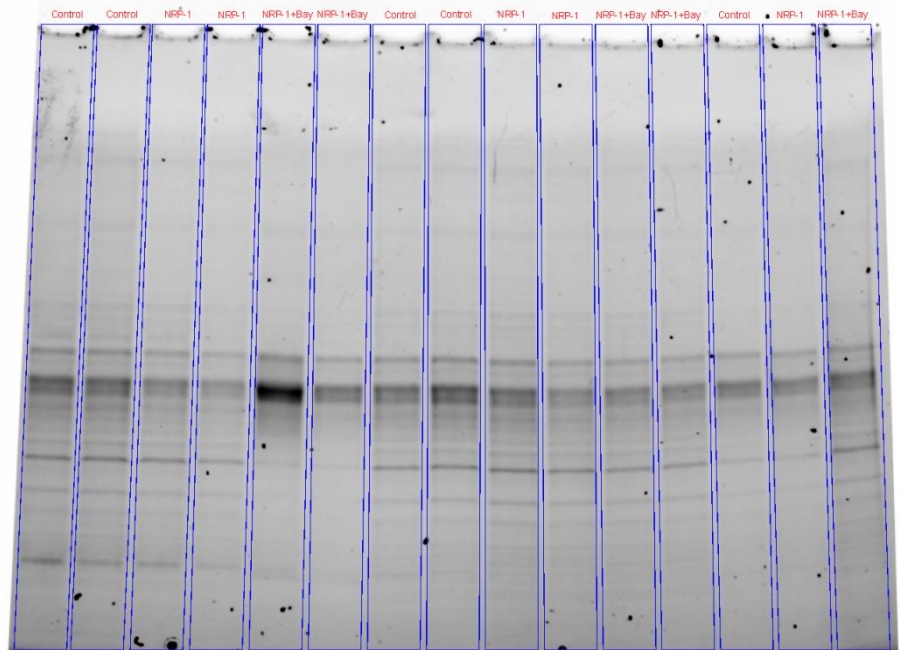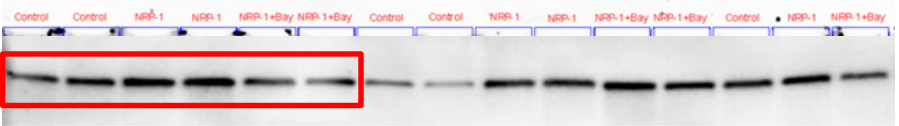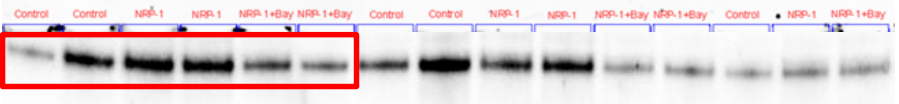

**Figure 5E -  $\alpha$ -SMA – 42 kDa**

**Figure 5E - Vimentin – 54 kDa**

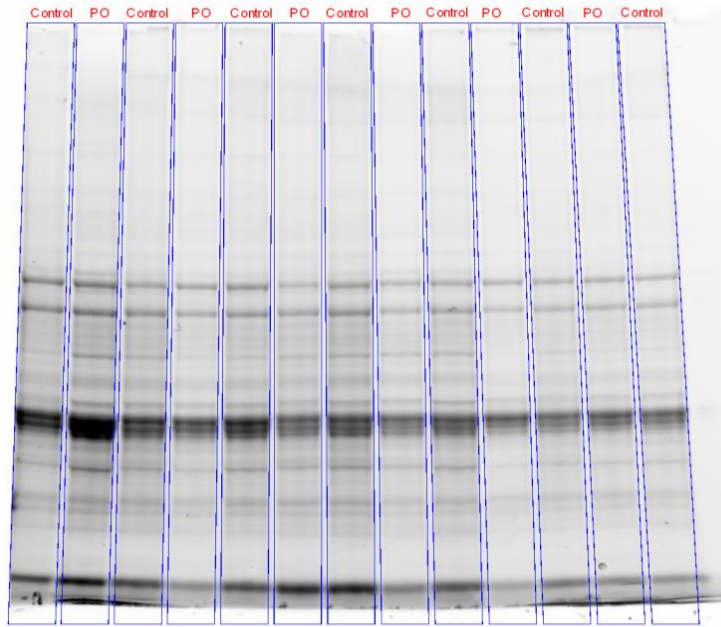

**Figure 6A - ST-2 – 29 kDa**

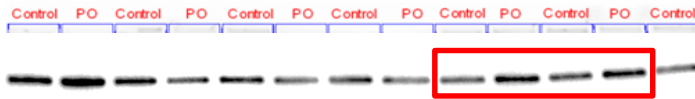

**Figure 6F - IL-33 – 30 kDa**

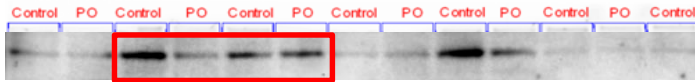

**Figure 6G - MyD88 – 33 kDa**

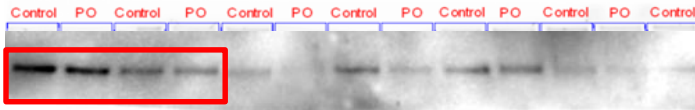

**Figure 6G - TRAF6 – 60 kDa**

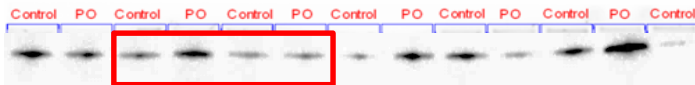

**Figure 6G - AP-1 – 39 kDa**

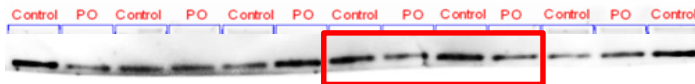

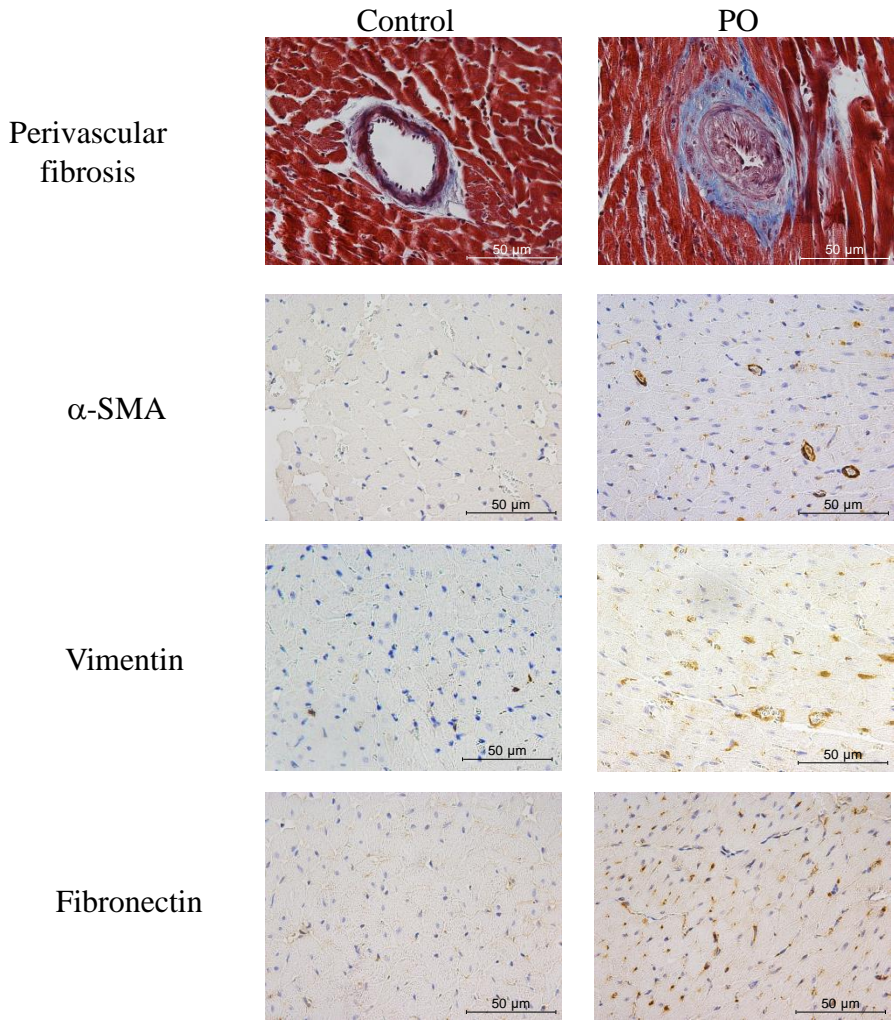

**Supplemental Figure 12**
